# Supplementary material
Source: Springer Nature journal article supplement (https://www.springermedizin.de/resource/supplementary/12936_2012_2599_MOESM3_ESM.pdf/9542970)

### Proportions of cured

ARS+MQ

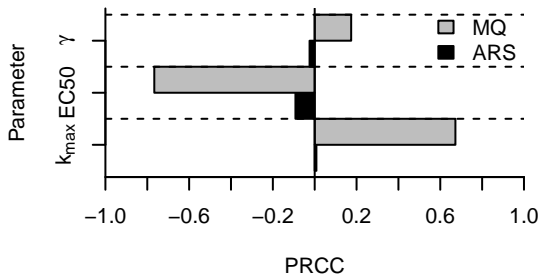

### PCTs

Parameter

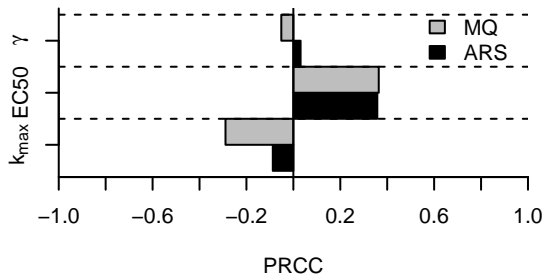

DHA+PQ

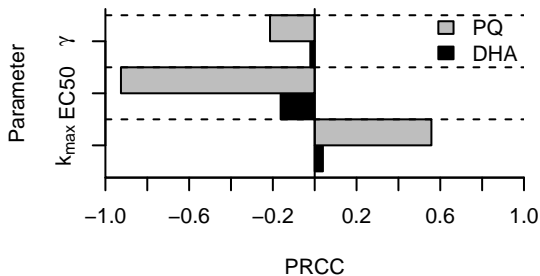

Parameter

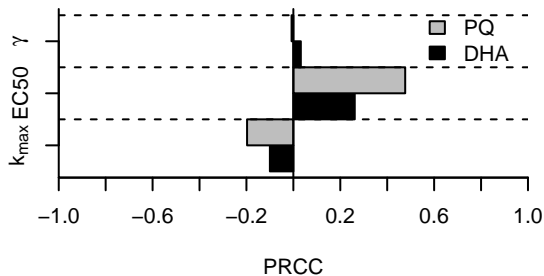

ART+LF

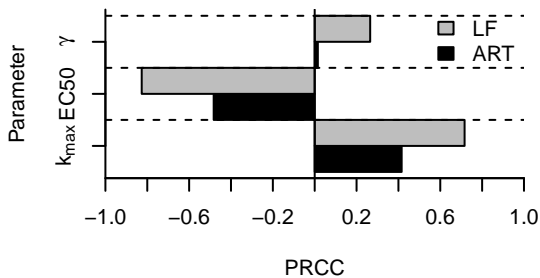

Parameter

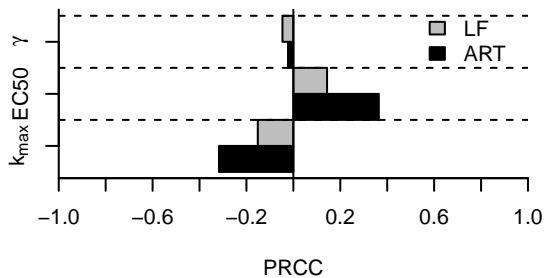

Supplement: MOESM3 [file 9542970]
